# Supplementary material for: Association between the degree of fibrosis in fibrotic focus and the unfavorable clinicopathological prognostic features of breast cancer
Source: PeerJ. 2019 Nov 15;7:e8067. doi: 10.7717/peerj.8067 (PMC6859872; doi:10.7717/peerj.8067)
Supplement: Supplemental Information 1 [file peerj-07-8067-s001.xlsx]

## Sheet: 2016
ID	age	family tumor histories	drinking history	smoking history	pathological pattern	stage	molecular subtypes	NPI	T	Number of lymph node metastasis	lymph node stage	Histological grade	Histological grade	Vascular invasion	Lymphatic vessel invasion	Nervous infiltration	degree of fibrosis in FF	ER	PR	Ki-67	Ki-67z1	C-erbB-2（IHC）	C-erbB-2（result）
001	60	NO	NO	NO	IDC	IIB	A	4.6	3	2	2	II	2	+	+	+	3	+	+	＜5%	≤14%	+	-
002	54	NO	NO	NO	IDC	IIIA	B-	6	5	4	3	II	2	+	+		3	-	+	80%+	>14%	1+	-
003	57	NO	NO	NO	IDC	IIA	B+	3.7	3.5	0	1	II	2	+			3	-	-	40%+	>14%	3+	+
004	62	YES	NO	NO	IDC	IIB	B-	4.5	2.5	1	2	II	2				3	+	+	20%+	>14%	±	-
005	47	NO	NO	NO	IDC	IIA	B?	2.6	3	0	1	I	1	+			3	+	+	30%+	>14%	2+
006	58	NO	NO	NO	IDC	IIA	B-	4.26	1.3	1	2	II	2	+	+		3	+	+	60%+	>14%	+	-
007	47	NO	NO	NO	IDC	IIIA	B-	6.3	1.5	5	3	III	3	+			2	-	+	30%+	>14%	1+	-
008	44	NO	NO	NO	IDC	I	B+	3.3	1.5	0	1	II	2				3	+	+	60%+	>14%	3+	+
009	62	NO	NO	NO	IDC	I	HER2	4.26	1.3	0	1	III	3				3	-	-	30%+	>14%	3+	+
010	40	NO	YES	NO	IDC	IIA	B-	3.5	2.5	0	1	II	2	-	-	+	3	+	+	15%+	>14%	—	-
011	39	NO	NO	NO	IDC	IIIA	-	5.7	3.5	4	3	II	2	+	+	-	2	-	-	70%+	>14%	—	-
012	65	NO	NO	NO	IDC	IIA	B?	4.8	4	0	1	III	3	-	-	+	1	+	-	70%+	>14%	2+-3+
013	46	NO	NO	NO	IDC	IIB		4.44	2.2	1	2	II	2	+	+	-	2	+	+	10%+	≤14%	+	-
014	49	NO	NO	NO	IDC	IIA		3.56	2.8	0	1	II	2	-	+	+	2	-	+	5%+	≤14%	2+
015	49	NO	YES	NO	IDC	IIIA	B-		6	2	2			-	-	+	3	+	+	40%+	>14%	+	-
016	58	NO	NO	NO	IDC	IIB	B?	4.96	4.8	2	2	II	2	+	+	-	3	+	+	30%+	>14%	1+-2+
017	46	NO	NO	NO	IDC	IIA	A	2.56	2.8	0	1	I	1	+	+	-	3	+	+	<5%+	≤14%	—	-
018	39	NO	NO	NO	IDC	IIB	B-	4.5	2.5	1	2	II	2	-	-	-	2	+	+	60%+	>14%	1+	-
019	57	NO	NO	NO	IDC	IIA	B?	5	5	0	1	III	3	+	-	+	3	-	-	70%+	>14%	2+
020	48	NO	NO	NO	IDC	IIB	B+	5.7	3.5	2	2	III	3	+	+	+	2	+	+	45%+	>14%	2+-3+	+
021	57	NO	NO	NO	IDC	IIA	-	3.6	3	0	1	II	2	+	+	-	2	-	-	70%	>14%	—	-
022	42	NO	NO	NO	IDC	IIB	B-	4.5	2.5	1	2	II	2		+		3	-	+	60%+	>14%	1+	-
023	34	NO	NO	NO	IDC	IIIA	HER2	6.5	2.5	9	3	III	3	+			3	-	-	70%+	>14%	3+	+
024	32	NO	YES	NO	IDC	IIA	A	2.46	2.3	0	1	I	1	-	-	-	2	+	+	5%+	≤14%	+	-
025	46	NO	NO	NO	IDC	IIA	-	4.9	4.5	0	1	III	3				2	-	-	0.9	>14%	—	-
026	50	NO	NO	NO	IDC	IIA		3.6	3	0	1	II	2			-	3	+	+	12%+	≤14%	2+-3+
027	56	YES	NO	NO	IDC	IIIA	B+	5.6	3	5	3	II	2	+	+	+	2	+	+	40%+	>14%	3+	+
028	51	NO	NO	NO	IDC	IIB	B?	5.7	3.5	3	2	III	3		+		3	+	+	35%+	>14%	2+-3+
029	44	NO	NO	NO	IDC	IIA		4.4	2	2	2	II	2		+		2	-	-	50%+	>14%	2+-3+
030	65	NO	NO	NO	IDC	I	-	3.4	2	0	1	II	2	+		+	2	-	-	15%+	>14%	1+	-
031	63	NO	NO	NO	IDC	IIB	HER2	5.6	3	1	2	III	3	+	+		3	-	-	0.15	>14%	3+	+
032	28	NO	NO	NO	IDC	IIIC	HER2	8.2	11	25	3	III	3	+		-	3	-	-	70%+	>14%	3+	+
033	64	NO	YES	NO	IDC	IIB	B+	4.6	3	0	1	III	3	+	+		3	+	-	60%+	>14%	3+	+
034	34	NO	NO	NO	IDC	IIIC	B-	6.4	7	12	3	II	2	+	+	-	3	+	+	30%+	>14%	±	-
035	51	NO	NO	NO	IDC	IIIA	B?	5.6	3	5	3	II	2	+	+		3	+	+	50%+	>14%	1+-2+
036	52	NO	NO	NO	IDC	IIB	B?	4.6	3	1	2	II	2	+			2	+	+	70%+	>14%	1+-2+
037	71	NO	NO	NO	IDC	IIA	B-		4	0	1					+	3	+	+	30%+	>14%	—	-
038	50	NO	YES	NO	IDC	IIIA		6.9	4.5	5	3	III	3	+			3	-	-	5%+	≤14%	1+-2+
039	55	NO	NO	NO	IDC	IIA	B-	5.4	2	2	2	III	3			+	3	+	+	40%+	>14%	+	-
040	48	NO	NO	NO	IDC	IIA	B?	3.5	2.5	0	1	II	2	+		-	2	+	+	10%+	≤14%	2+-3+
041	69	NO	NO	NO	IDC	IIA	B+	4.9	4.5	0	1	III	3	+	+	-	3	-	-	40%+	>14%	3+	+
042	41	NO	YES	NO	IDC	IIIA	B-	5.6	3	5	3	II	2		+	+	3	+	+	70%+	>14%	+	-
043	32	NO	NO	NO	IDC	IIIC	B-	5.6	3	34	3	II	2	+		+	2	+	+	50%+	>14%	+	-
044	49	NO	NO	NO	IDC	IIA	B-		2.5	0	1			-	-	-	1	+	-	5%+	≤14%	+	-
045	66	NO	NO	NO	IDC	I	B?	3.4	2	0	1	II	2	-	-	-	2	+	+	20%+	>14%	2+
046	49	NO	NO	NO	IDC	I		3.3	1.5	0	1	II	2				3	-	+	4%+	≤14%	2+
047	65	NO	YES	NO	IDC	IIB	HER2		3	3	2			-		-	3	-	-	50%+	>14%	3+	+
048	59	NO	NO	NO	IDC	IIIA		5.4	2	8	3	II	2	+	+		3	-	-	15%+	>14%	2+-3+
049	60	NO	NO	NO	IDC	IIB	HER2	5.1	5.5	0	1	III	3	-	-	+	2	-	-	—	≤14%	3+	+
050	73	YES	NO	NO	IDC	I	B?	3.3	1.5	0	1	II	2	+		+	2	+	+	20%+	>14%	2+
051	36	NO	NO	NO	IDC	IIIA	B?	5.6	3	7	3	II	2	+		-	3	+	+	70%+	>14%	2+-3+
052	53	NO	YES	NO	IDC	IIIA	B+	5.1	5.5	1	2	II	2				3	+	-	60%+	>14%	3+	+
053	53	NO	NO	NO	IDC	IIA	-	4.5	2.5	0	1	III	3				3	-	-	50%+	>14%	—	-
054	50	NO	NO	NO	IDC	IIA	B?	4.4	2	3	2	II	2	+	+		3	+	+	80%+	>14%	2+
055	79	NO	NO	NO	IDC	IIB	B-	4.5	2.5	3	2	II	2	+	+	+	3	+	+	5%+	≤14%	1+	-
056	46	NO	NO	NO	IDC	IIIA	B?	6.8	4	6	3	III	3	-	-	-	3	+	+	80%+	>14%	2+
057	42	NO	NO	NO	IDC	IIB	B-	5.6	3	1	2	III	3	+	+		3	+	+	20%+	>14%	+	-
058	47	NO	NO	NO	IDC	IIA	A	3.8	4	0	1	II	2	+	-	+	3	+	+	10%+	≤14%	1+	-
059	40	YES	NO	NO	IDC	IIA	B-	5.4	2	1	2	III	3	+			2	-	+	25%+	>14%	—	-
060	62	NO	NO	NO	IDC	IIA	A	4.4	2	1	2	II	2	+		+	3	+	+	0.02	≤14%	-	-
061	56	NO	YES	NO	IDC	IIA	-	5.36	1.8	3	2	III	3	-	-	-	2	-	-	60%+	>14%	±	-
062	53	NO	NO	NO	IDC	I	B-	4.32	1.6	0	1		3	+	+	-	3	+	+	50%+	>14%	1+	-
063	45	NO	NO	NO	IDC	IIIC	B-	6.3	1.5	24	3		3	-	-	-	1	-	+	70%	>14%	—	-
064	47	NO	NO	NO	IDC	IIA	-	4.8	4	0	1		3				3	-	-	>75%	>14%	1+	-
065	43	NO	NO	NO	IDC	IIIC	-	8.7	13.5	21	3		3		+	+	3	-	-	70%+	>14%	—	-
066	52	NO	YES	NO	IDC	IIB	B+	6	5	1	2		3	+	+	+	2	+	-	60%+	>14%	3+	+
067	51	NO	NO	NO	IDC	I	-	4.4	2	0	1		3	-	-	-	1	-	-	>75%	>14%	—	-
068	42	NO	NO	NO	IDC	I	B?	4.4	2	0	1		3	-	+	-	3	+	+	30%+	>14%	2+
069	37	NO	NO	NO	IDC	IIIA		5.9	4.5	6	3		2	-	+	-	2	+	+			3+	+
070	58	NO	NO	NO	IDC	IIA		4.6	3	0	1		3	-	-	-	3	-	-	20%+	>14%	2+-3+
071	55	NO	NO	NO	IDC	IIIA	HER2	6.9	4.5	4	3		3	+	-	+	3	-	-	30%+	>14%	2+-3+	+
072	57	NO	NO	NO	IDC	IIIC	HER2	6.8	4	18	3		3	+	+		3	-	-	3%+	≤14%	3+	+
073	44	NO	YES	NO	IDC	IIA	A	3.6	3	0	1		2				2	+	+	10%+	≤14%	1+	-
074	58	NO	YES	NO	IDC	IIA	B?	1.6	3	0	1						3	+	+	60%+	>14%	1+-2+
075	67	NO	NO	NO	IDC	I		4.4	2	0	1		3	+	-	-	2	+	+	10%+	≤14%	2+
076	40	NO	NO	NO	IDC	I	A	2.3	1.5	0	1		1	-	-	-	2	+	+	5%+	≤14%	O	-
077	45	NO	NO	NO	IDC	IIA	B-	5.2	1	2	2		3	+	-	-	2	+	+	30%+	>14%	1+	-
078	50	NO	NO	NO	IDC	I	-	4.5	2.5	0	1		3	-	-	-	1	-	-	80%+	>14%	1+	-
079	51	NO	NO	NO	IDC	I	B-	4.4	2	0	1		3	-	-	-	2	+	-	40%+	>14%	O	-
080	63	NO	NO	NO	IDC	IIA	-	2	5	0	1						3	-	-	90%+	>14%	部分+	-
081	44	NO	NO	NO	IDC	IIA	B-	2.2	1	1	2						3	+	+	20%+	>14%	1+	-
082	51	NO	NO	NO	IDC	I	B+	3.4	2	0	1		2	-	-	-	3	+	+	5%+	≤14%	3+	+
083	61	NO	NO	NO	IDC	I	B-	3.2	1	0	1		2	-	-	-	3	+	+	10%+	≤14%	1+	-
084	47	NO	NO	NO	IDC				2					+	+	+	2
085	52	NO	NO	NO	IDC	I	-	3.24	1.2	0	1		2	-	-	-	1	-	-	5%+	≤14%	1+	-
086	41	NO	NO	NO	IDC	IIA	B-	2.5	2.5	0	1		1	+		+	2	+	+	30%+	>14%	1+	-
087	44	NO	NO	NO	IDC	I	B+	3.32	1.6	0	1		2				2	-	+	50%+	>14%	3+	+
088	38	NO	NO	NO	IDC	I	B-	3.3	1.5	0	1		2	-	-	-	2	+	+	40%+	>14%	+	-
089	46	NO	YES	NO	IDC	I	A	3.4	2	0	1		2	-	-	-	2	+	+	<10%+	≤14%	+	-
090	53	NO	NO	NO	IDC	IIIA	B+	5.1	5.5	1	2		2				3	+	-	60%+	>14%	3+	+
091	63	NO	NO	NO	IDC	IIA	B?	4.4	2	1	2		2				2	+	-	30%+	>14%	2+-3+
092	49	NO	NO	NO	IDC	IIA	B-	4.44	2.2	0	1		3	+	+		3	+	+	40%	>14%	—	-
093	45	NO	YES	NO	IDC	IIB		4.6	3	1	2		2	+	+	+	3	+	+	10%+	≤14%	—	-
094	103	YES	NO	NO	IDC	IIB	-	5	5	1	2		2				3	-	-	80%+	>14%	—	-
095	42	NO	NO	NO	IDC	I	B+	3.3	1.5	0	1		2	-	-	-	2	+	+	20%+	>14%	3+	+
096	47	NO	NO	NO	IDC	IIA	B?	3.9	4.5	0	1		2	-	-		2	+	+	30%+	>14%	2+
097	53	NO	NO	NO	IDC	IIIC	B-	6.2	6	11	3		2	-	-	-	2	+	+	70%+	>14%	—	-
098	41	NO	NO	NO	IDC	I		3.4	2	0	1		2	+			3	+	+	10%+	≤14%	2+
099	52	NO	NO	NO	IDC	IIB	B?	5	5	1	2		2	+	-	-	2	+	-	30%+	>14%	1+-2+
100	51	NO	NO	NO	IDC		A			0	1		2	+	-	-	2	+	+	10%+	≤14%	—	-
101	65	NO	NO	NO	IDC	IIB	HER2	4.7	3.5	2	2		2	-	+	-	3	-	-	70%+	>14%	3+	+
102	46	NO	NO	NO	IDC		-		3.5				2				3	-	-	80%+	>14%	1+	-
103	56	NO	YES	NO	IDC	IIIC	HER2	5.8	4	10	3		2	-	+	-	3	-	-	30%+	>14%	3+	+
104	61	NO	NO	NO	IDC	IIIA	B-	6.3	6.5	7	3		2	-	-	+	3	+	+	40%+	>14%	—	-
105	39	NO	NO	NO	IDC	I	B?	4.2	1	0	1		3	+	+	-	3	+	+	40%+	>14%	2+
106	78	NO	NO	NO	IDC	IIA	-	3.7	3.5	0	1		2	+	+	-	2	-	-	>75%	>14%	-	-
107	52	NO	NO	NO	IDC	IIIA	B-	4	10	1	2						3	+	+	40%+	>14%	—	-
108	50	NO	NO	NO	IDC	IIB	HER2	6	5	1	2		3	+	+	-	3	-	-	80%+	>14%	3+	+
109	41	NO	NO	NO	IDC	IIA	-	4.5	2.5	0	1		3	-	-	-	2	-	-	40%+	>14%	O	-
110	59	NO	NO	NO	IDC	I	B-	4.24	1.2	0	1		3	-	-	-	2	+	-	>75%	>14%	O	-
111	54	NO	NO	NO	IDC	I	B-	4.3	1.5	0	1		3				3	+	+	50%+	>14%	—	-
112	35	NO	NO	NO	IDC	IIIA	-	6.7	3.5	6	3		3	+	-	+	1	-	-	30%+	>14%	O	-
113	51	NO	NO	NO	IDC	IIB	B?	3	5	2	2			-	-	+	2	+	+	30%+	>14%	1+-2+
114	34	NO	NO	NO	IDC	IIIC	B+	5	5	13	3		1	-	-	-	2	+	+	70%	>14%	3+	+
115	54	NO	YES	NO	IDC	IIIA	HER2	5.2	6	2	2		2	+	+	-	2	-	-	80%+	>14%	3+	+
116	48	NO	NO	NO	IDC	I	A	3.08	0.4	0	1		2		+	-	1	+	+	2%+	≤14%	1+	-
117	55	NO	NO	NO	IDC	I	HER2	3.4	2	0	1		2	+	-	-	3	-	-	10%+	≤14%	3+	+
118	60	NO	NO	NO	IDC	IIA	A	4.3	1.5	1	2		2	-	+	-	3	+	+	约10%	≤14%	1+	-
119	62	NO	NO	NO	IDC	IIB	B+	4.6	3	2	2		2				3	+	-	60%+	>14%	3+	+
120	52	NO	NO	NO	IDC	IIB	A	2.44	2.2	3	2			+	+	-	2	+	+	10%+	≤14%	+	-
121	60	NO	NO	NO	IDC	IIA	B-	4.6	3	0	1		3	-	-	-	2	+	+	40%+	>14%	±	-
122	43	NO	NO	NO	IDC	IIIC	-	8.7	13.5	22	3		3	-	+	+	3	-	-	70%+	>14%	—	-
123	55	NO	NO	NO	IDC	IIIC	B-	5.9	4.5	12	3		2	+	-	-	2	+	+	20%+	>14%	1+	-
124	54	NO	NO	NO	IDC	IIA	B-	4.4	2	2	2		2	-	-	-	1	+	+	+30%+	>14%	1+	-
125	79	NO	NO	NO	IDC	IIB	B?	4.6	3	3	2		2	+	-	-	3	+	+	20%+	>14%	1+~2+
126	46	NO	NO	NO	IDC	I	A	3.2	1	0	1		2	-	-	-	2	+	+	5%+	≤14%	1+	-
127	39	NO	NO	NO	IDC	IIIC	B-	6.4	2	10	3		3	-	+	-	3	+	+	60%+	>14%	1+	-
128	46	NO	YES	NO	IDC	IIA	-	3.7	3.5	0	1		2	-	-	-	3	-	-	80%+	>14%	1+	-
129	57	NO	NO	NO	IDC	IIIA	B-	6.6	3	7	3		3	-	-	+	3	+	+	80%+	>14%	—	-
130	43	NO	NO	NO	IDC	I	B-	3.36	1.8	0	1		2	-	-	-	3	+	+	30%	>14%	1+	-
131	45	NO	NO	NO	IDC	IIIC	B-	5.3	1.5	24	3		2	-	-	-	1	-	+	70%+	>14%	—	-
132	52	NO	NO	NO	IDC	IIA	B-	3.5	2.5	0	1		2			+	2	+	+	50%+	>14%	1+	-
133	53	NO	NO	NO	IDC	IIA	B+	4.56	2.8	0	1		3	+	+	-	2	+	-	70%+	>14%	3+	+
134	54	NO	NO	NO	IDC	IIA	-	5.5	2.5	1	2		3	-	-	-	3	-	-	30%+	>14%	0	-
135	60	NO	NO	NO	IDC	IIA	HER2	5.4	2	1	2		3	-	-	-	3	-	-	50%+	>14%	3+	+
136	47	NO	NO	NO	IDC	IIIC	B?	3.7	3.5	18	3					-	3	+	+	50%+	>14%	2+
137	65	NO	NO	NO	IDC	IIIA	B?	6.4	2	6	3		3	+			3	+	-	40%+	>14%	2+
138	57	NO	YES	NO	IDC		B-		2					+	+	-	3	+	+	20%	>14%	—	-
139	45	NO	NO	NO	IDC	IIIC		3.6	3	15	3			-	-	-	2	+	+			1+	-
140	33	NO	YES	NO	IDC	IIA		5.4	2	2	2		3	-	-	-	2	-	-	70%+	>14%	2+~3+
141	56	NO	NO	NO	IDC	IIIA	-	6.4	2	6	3		3	-	-	-	3	-	-	60%+	>14%	1+	-
142	47	NO	NO	NO	IDC	IIA	B-	4.8	4	1	2		2				2	+	+	80%+	>14%	2+	-
143	63	NO	NO	NO	IDC	IIB	HER2	5.6	3	2	2		3	+	-	-	3	-	-	80%+	>14%	3+	+
144	50	NO	NO	NO	IDC	IIB	B-	5.7	3.5	1	2		3	-	-	-	3	+	+	40%+	>14%	1+	-
145	57	NO	NO	NO	IDC	IIA	B-	5.2	1	2	2		3				2	+	+	40%+	>14%	-	-
146	64	NO	NO	NO	IDC	IIIC	HER2	5.8	4	14	3		2	+	+	+	3	-	-	60%+	>14%	3+	+
147	38	NO	NO	NO	IDC	IIIA	-	5.36	1.8	5	3		2		+		2	-	-	70%+	>14%	1+	-
148	46	YES	NO	NO	IDC	IIB	B-	5.7	3.5	1	2		3	+	+	-	3	+	+	＞70%	>14%	-	-
149	80	NO	NO	NO	IDC	I	B-	3.4	2	0	1		2	-	-	-	2	+	+	15%+	>14%	1+	-
150	48	NO	NO	NO	IDC	I	B-	1.36	1.8	0	1			+		+	3	+	+	70%+	>14%	1+	-
151	51	NO	NO	NO	IDC	IIIC		7.2	6	14	3		3	+	+		2	+	+	10%+	≤14%	2+
152	61	NO	NO	NO	IDC	IIA	B-	3.5	2.5	0	1		2	-	-	-	3	+	+	30%+	>14%	O	-
153	68	NO	NO	NO	IDC	IIA	B?	4.54	2.7	0	1		3				3	+	-	60%+	>14%	2+
154	44	NO	NO	NO	IDC	IIB	B+	5.5	2.5	3	2		3	+	-	-	1	+	-	80%+	>14%	3+	+
155	48	NO	NO	NO	IDC	IIA	B-	1.8	4	0	1						3	+	+	50%+	>14%	—	-
156	40	NO	NO	NO	IDC	I	A	1.3	1.5	0	1			+	+		2	+	+	10%+	≤14%	O	-
157	62	NO	YES	NO	IDC	IIB	B+	2.6	3	2	2						3	+	-	60%+	>14%	3+	+
158	66	NO	NO	NO	IDC	IIIC		6.4	7	18	3		2	-	-	-	2	-	-	10%+	≤14%	2+
159	59	NO	NO	NO	IDC	I	A	3.2	1	0	1		2	-	-	-	2	+	+	<10%+	≤14%	+	-
160	42	NO	NO	NO	IDC	IIA	B+	4.5	2.5	0	1		3				3	+	-	50%+	>14%	3+	+
161	34	NO	NO	NO	IDC	IIIA		5.6	3	6	3		2				3	+	+			+	-
162	52	NO	NO	NO	IDC	IIIA	B-	6	10	1	2		2				3	+	+	40%+	>14%	—	-
163	53	NO	NO	NO	IDC	I	A	3.3	1.5	0	1		2				3	+	+	10%+	≤14%	1+~2+	-
164	67	NO	NO	NO	IDC	IIB	-	5.5	2.5	1	2		3				2	-	-	80%+	>14%	+	-
165	67	NO	NO	NO	IDC	I	B-	4.3	1.5	0	1		3	-	-	-	2	+	+			1+	-
166	53	NO	NO	NO	IDC	IIA	HER2	5	5	0	1		3	-	-	-	3	-	-	60%+	>14%	3+	+
167	54	NO	NO	NO	IDC	IIA	B-	3.34	1.7	3	1		2	-	-	-	2	+	+	40%+	>14%	—	-
168	43	NO	YES	NO	IDC	IIA	-	3.8	4	0	1		2	-	-	-	2	-	-	90%+	>14%	—	-
169	53	NO	NO	NO	IDC	IIA		1.9	4.5	0	1			-	-	-	2	-	-	20%+	>14%	2+
